# Supplementary material for: Multivariate analysis applied to Raman mapping of dye-functionalized carbon nanotubes: a novel approach to support the rational design of functional nanostructures
Source: Royal Society of Chemistry journal article supplement (doi:10.1039/c5an00820d), 2015-01-01
Supplement: c5an00820d1.pdf [file c5an00820d1.pdf]

## Supplementary Information

### Multivariate Analysis Applied to Raman Mapping of dye-functionalized Carbon nanotubes: a novel approach to support the rational design of functional nanostructures

*Sonja Visentin, Nadia Barbero, Francesca Romana Bertani, Mariangela Cestelli Guidi, Giuseppe Ermondi, Guido Viscardi and Valentina Mussi\**

#### Raman measurements and Principal Component Analysis

Subtle differences can be identified in the Raman spectra acquired at different positions of the same sample. Figure S1 shows two spectra obtained at different points on the powder sample of oxidized CNTs treated with cyanine.

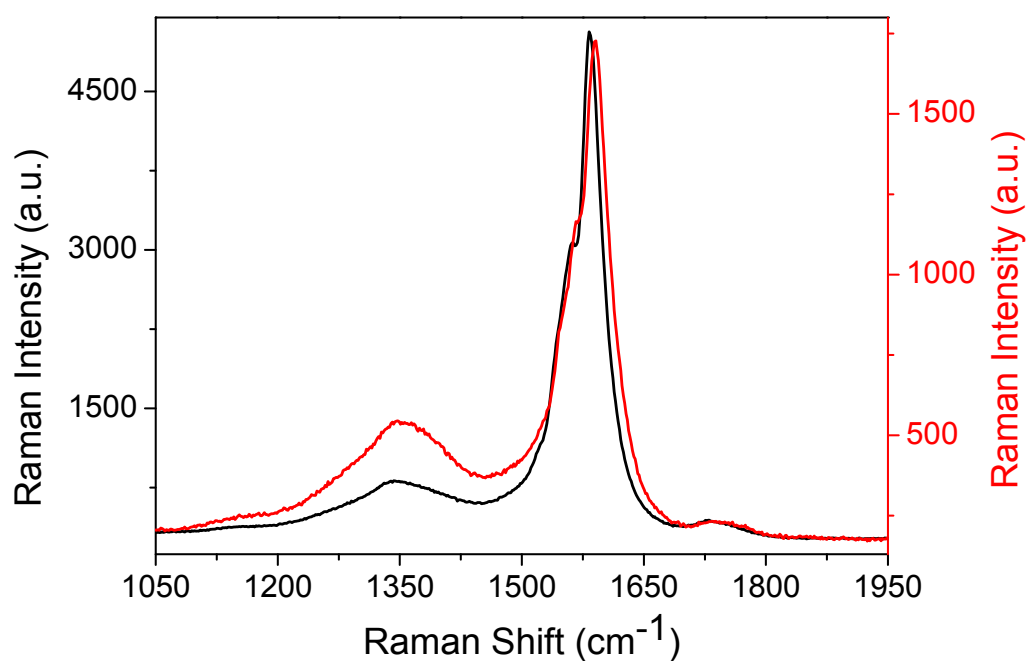

Figure S1

Figure S2 presents the results of the Lorentzian fit performed on the curves shown in figure 1 of the main text (pristine CNTs on the left, oxidized CNTs on the right). The fits allowed to obtain the D and G band intensities, calculated as the area of the respective spectroscopic features located at about 1330 and 1590  $\text{cm}^{-1}$ . The ratio R between the D and G band intensities has been then calculated to estimate the CNT structural disordering induced by the oxidation procedure. The Raman spectrum collected on pristine CNTs is associated to an R value of  $(0.21 \pm 0.02)$ , which rises to  $(1.7 \pm 0.1)$  after the chemical treatment.

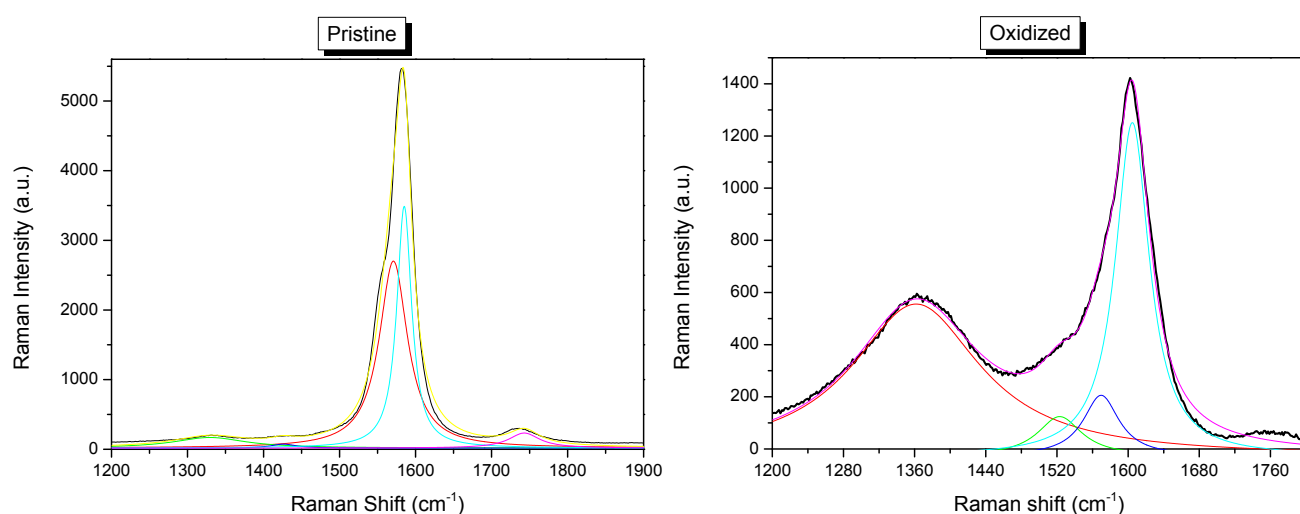

**Figure S2**

Figure S3 presents the results of Principal Component Analysis obtained when considering maps collected on pristine CNTs (black circles), on pristine CNTs treated with rhodamine (grey down-triangles), on oxidized CNTs (magenta squares) and in two different areas of the powder sample of oxidized CNTs treated with rhodamine (red up-triangles and orange diamonds). The last two maps are almost superposed.

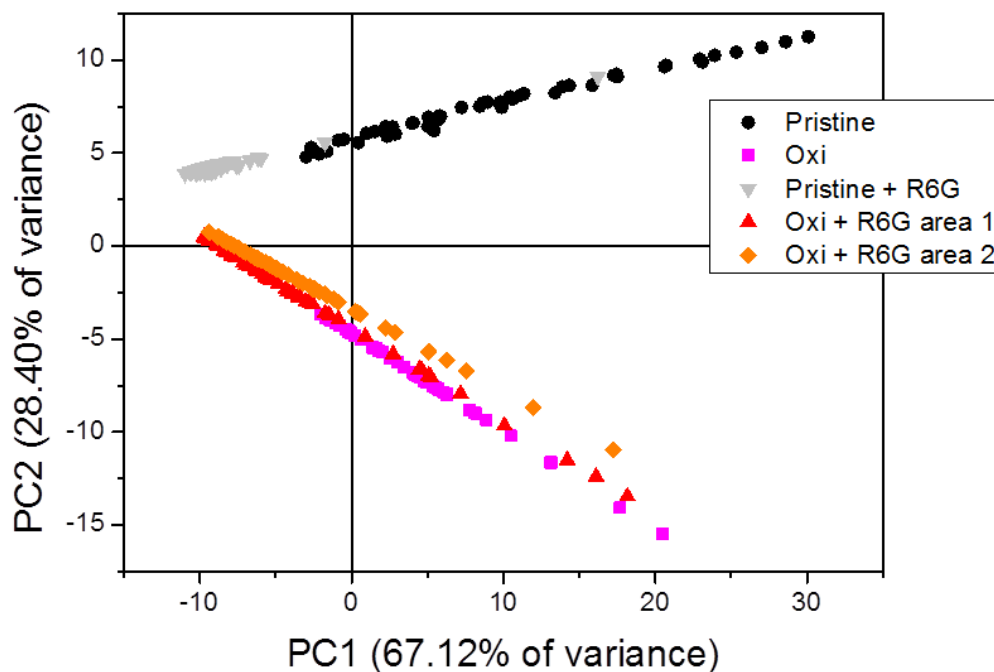

Figure S3.

Figure S4 shows the comparison between the results obtained with Principal Component Analysis applied to Raman maps collected on differently treated CNTs when using the Covariance matrix (left side) and the Correlation matrix (right side).

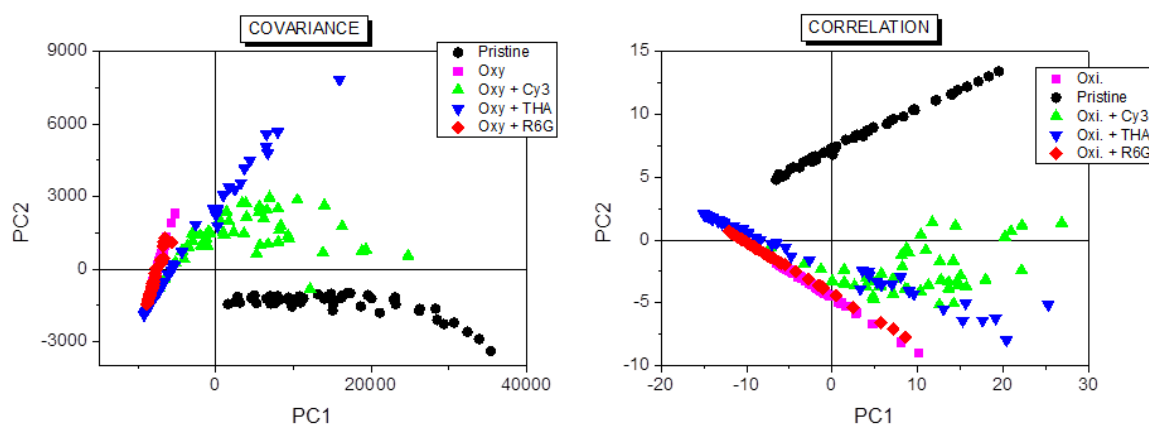

Figure S4

Table S1 contains the complete list of the Raman shifts used for the Principal Components Analysis. The wavenumbers are chosen in the spectral ranges corresponding to the RBM, D, G, M and G' bands, as indicated in the Table.

**Table S1**

| Spectral Band | Wavenumbers (cm <sup>-1</sup> ) |
|---------------|---------------------------------|---------------|---------------------------------|---------------|---------------------------------|---------------|---------------------------------|---------------|---------------------------------|
| R B M         | 1 0 9 . 1 2 4 5 4               | D             | 1239.74                         | G             | 1470.1949                       | M             | 1700.123                        | G '           | 2403.2261                       |
|               | 1 2 0 . 7 9 1 4                 |               | 1249.9067                       |               | 1480.0563                       |               | 1709.6799                       |               | 2413.293                        |
|               | 1 3 0 . 5 0 4 5                 |               | 1260.0598                       |               | 1489.9047                       |               | 1720.8156                       |               | 2423.344                        |
|               | 1 4 0 . 2 0 5 3                 |               | 1270.1992                       |               | 1499.74                         |               | 1730.3458                       |               | 2433.3813                       |
|               | 1 4 9 . 8 9 4 0                 |               | 1280.3251                       |               | 1509.5623                       |               | 1739.8636                       |               | 2441.9712                       |
|               | 1 5 9 . 5 7 4 6                 |               | 1290.4374                       |               | 1519.3716                       |               | 1750.9512                       |               | 2443.4011                       |
|               | 1 6 9 . 2 4 3 1                 |               | 1300.5361                       |               | 1530.8003                       |               | 1760.4424                       |               | 2453.4075                       |
|               | 1 8 0 . 8 3 0 9                 |               | 1310.6232                       |               | 1540.5819                       |               | 1771.4996                       |               | 2463.3962                       |
|               | 1 9 0 . 4 7 5 2                 |               | 1320.6949                       |               | 1550.3506                       |               | 1780.9628                       |               | 2473.3716                       |
|               | 2 0 0 . 1 0 9 6                 |               | 1330.7551                       |               | 1560.1064                       |               | 1790.4137                       |               | 2483.3313                       |
|               | 2 0 9 . 7 3 2 0                 |               | 1339.1261                       |               | 1561.7311                       |               | 1801.4232                       |               | 2493.2739                       |
|               | 2 1 9 . 3 4 6 4                 |               | 1350.8334                       |               | 1564.9794                       |               |                                 |               | 2503.2029                       |
|               | 2 3 0 . 8 6 7 7                 |               | 1360.8514                       |               | 1568.2264                       |               |                                 |               | 2513.1167                       |
|               | 2 4 0 . 4 5 6 1                 |               | 1370.858                        |               | 1571.4705                       |               |                                 |               | 2523.0151                       |
|               |                                 |               | 1380.8512                       |               | 1574.7151                       |               |                                 |               | 2534.3074                       |
|               |                                 |               | 1390.8312                       |               | 1577.9585                       |               |                                 |               | 2544.1736                       |
|               |                                 |               | 1400.7979                       |               | 1581.1989                       |               |                                 |               | 2554.0247                       |
|               |                                 |               | 1410.7513                       |               | 1584.438                        |               |                                 |               | 2563.8589                       |
|               |                                 |               | 1420.6915                       |               | 1587.6777                       |               |                                 |               | 2573.6797                       |
|               |                                 |               | 1430.6185                       |               | 1589.2953                       |               |                                 |               | 2582.0845                       |
|               |                                 |               | 1440.5323                       |               | 1590.9144                       |               |                                 |               | 2590.4775                       |
|               |                                 |               | 1450.433                        |               | 1600.6154                       |               |                                 |               | 2591.8767                       |
|               |                                 |               | 1460.3206                       |               | 1610.3055                       |               |                                 |               | 2603.0483                       |
|               |                                 |               |                                 |               | 1621.5925                       |               |                                 |               | 2612.8088                       |
|               |                                 |               |                                 |               | 1631.2537                       |               |                                 |               | 2623.9436                       |
|               |                                 |               |                                 |               | 1640.9038                       |               |                                 |               | 2633.6709                       |
|               |                                 |               |                                 |               | 1650.5397                       |               |                                 |               | 2643.3835                       |
|               |                                 |               |                                 |               | 1660.1627                       |               |                                 |               | 2653.0813                       |
|               |                                 |               |                                 |               | 1671.3738                       |               |                                 |               | 2662.7642                       |

2672.4324  
2682.0842  
2691.7229  
2702.7192  
2713.6973  
2723.2871  
2732.8608

PRISTINE CNTs

Principal Component 2

Principal Component 1

**Figure S5**

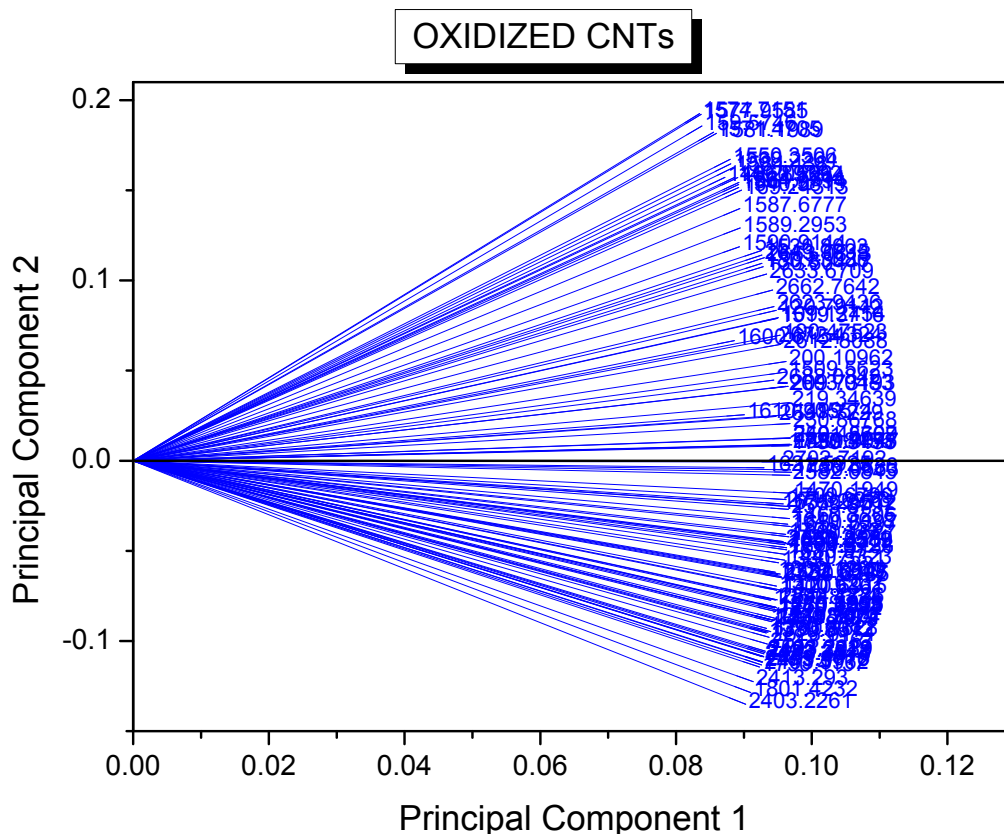

**Figure S6**

### **Oxidation procedure of pristine SWCNTs**

Pristine SWCNTs, purchased from Sigma Aldrich have been oxidized by acid treatment as following: the SWCNT containing powder was ultrasonicated at 40°C in a highly acidic 3:1 mixture of H<sub>2</sub>SO<sub>4</sub> and HNO<sub>3</sub> for 3 hours. The as collected filtered powder (oxidized SWCNTs) was then characterized.

### **Spectrochemical titration**

In Figure S7, panel a), fluorescence spectra of THA at different concentrations are shown as an example of spectrochemical titration. Panel b) presents the calibration curves for THA, R6G and Cy3 (three to five points from  $9.7 \times 10^{-8}$  to  $2.4 \times 10^{-7}$ ; mother solution  $9.7 \times 10^{-5}$ ) done by using the fluorimetric method described in the experimental section of the paper ( $R^2 = 0.999$ ).

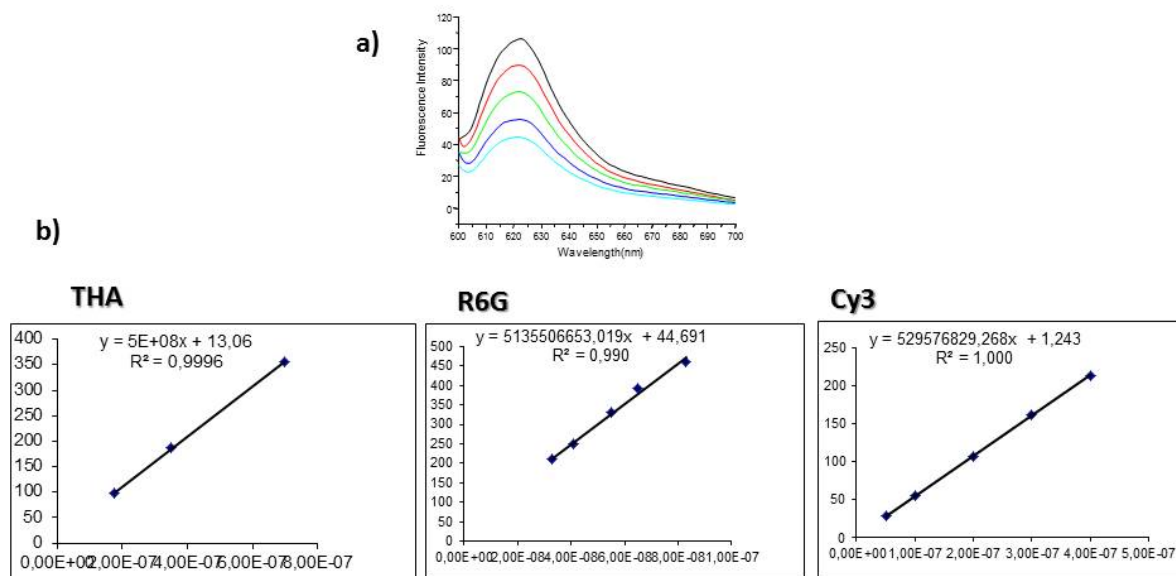

**Figure S7**

Figure S8 shows examples of fluorescent spectra of dyes reacted with pristine SWCNTs (p-SW) and oxidized SWCNTs (f-SWCNTs). For non oxidized nanotubes the resulting dye solution was diluted 400 times.

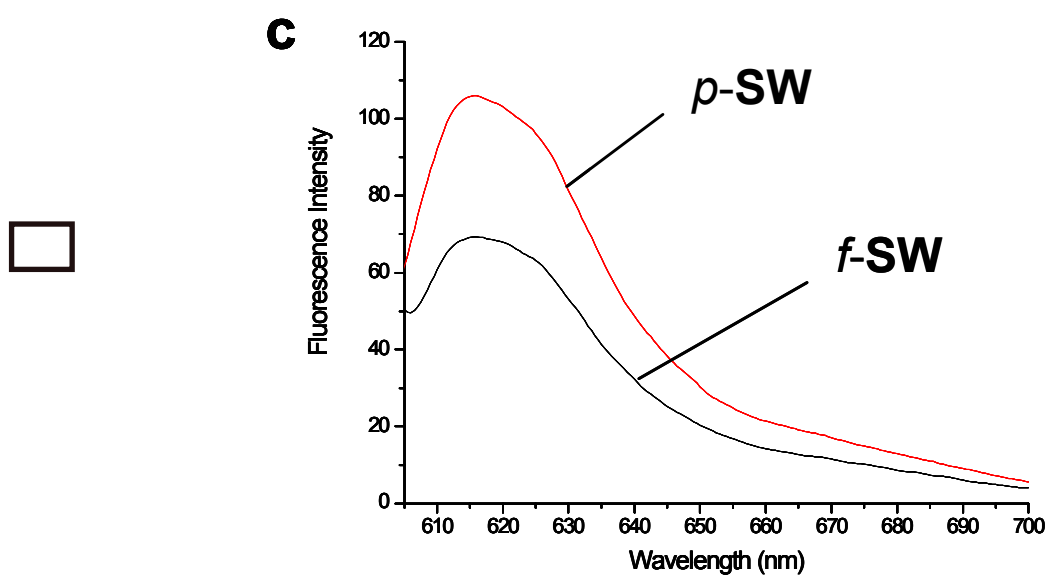

**Figure S8**

Figure S9 shows the difference of dye concentration calculated in the presence of oxidized SWCNTs and pristine SWCNTs (see paragraph 3.4 of the text).

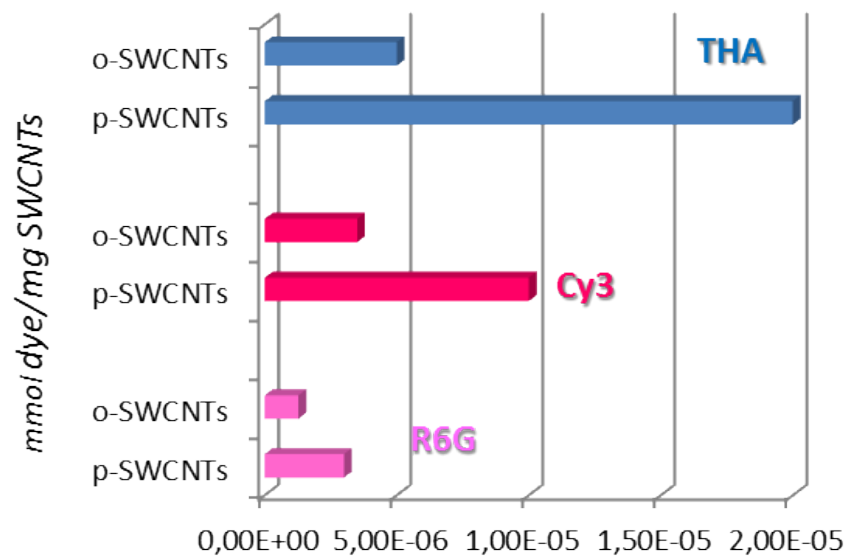

Figure S9
